# Supplementary material for: Controlling the visible-light driven photocatalytic activity of alloyed ZnSe–AgInSe2 quantum dots for hydrogen production
Source: Royal Society of Chemistry journal article supplement (doi:10.1039/d0ta04127k), 2020-01-01
Supplement: d0ta04127k1.pdf [file d0ta04127k1.pdf]

Electronic Supplementary Information

# Controlling visible-light driven photocatalytic activity of alloyed ZnSe-AgInSe<sub>2</sub> quantum dots for hydrogen production

Ping-Yen Hsieh,<sup>a</sup> Tatsuya Kameyama,<sup>b</sup> Takayuki Takiyama,<sup>b</sup> Ko Masuoka,<sup>b</sup> Takahisa Yamamoto,<sup>b</sup>  
Yung-Jung Hsu<sup>\*a,c</sup> and Tsukasa Torimoto<sup>\*b</sup>

<sup>a</sup>Department of Materials Science and Engineering, National Chiao Tung University, Hsinchu 30010, Taiwan

<sup>b</sup>Graduated School of Engineering, Nagoya University, Chikusa-ku, Nagoya 464-8603, Japan

<sup>c</sup>Center for Emergent Functional Matter Science, National Chiao Tung University, Hsinchu 30010, Taiwan

\*E-mail: [yhsu@cc.nctu.edu.tw](mailto:yhsu@cc.nctu.edu.tw)

\*E-mail: [torimoto@chembio.nagoya-u.ac.jp](mailto:torimoto@chembio.nagoya-u.ac.jp)

**Table S1.** Fitting results of TRPL data for OLA-ZAISe( $x$ , 0.5) and MPA-ZAISe( $x$ , 0.5) with various  $x$  values.

|         | Ligand | A <sub>1</sub> (%) | $\tau_1$ (ns) | A <sub>2</sub> (%) | $\tau_2$ (ns) | A <sub>3</sub> (%) | $\tau_3$ (ns) | $\langle\tau\rangle_{\text{avg}}$ | $X^2$ | $k_{\text{ct}}(10^6 \text{ s}^{-1})$ |
|---------|--------|--------------------|---------------|--------------------|---------------|--------------------|---------------|-----------------------------------|-------|--------------------------------------|
| $x=0.1$ | OLA    | 2.5                | 194           | 14.4               | 43.9          | 83.1               | 3.57          | 87.4                              | 1.03  | 0.858                                |
|         | MPA    | 2.6                | 184           | 18.3               | 36.6          | 79.1               | 3.21          | 81.3                              | 1.08  |                                      |
| $x=0.3$ | OLA    | 11.4               | 259           | 21.0               | 53.7          | 67.6               | 4.04          | 189                               | 1.03  | 3.18                                 |
|         | MPA    | 5.8                | 192           | 17.7               | 33.2          | 76.5               | 3.88          | 118                               | 1.09  |                                      |
| $x=0.5$ | OLA    | 9.4                | 446           | 25.6               | 92.4          | 65.0               | 4.56          | 305                               | 1.08  | 3.30                                 |
|         | MPA    | 5.4                | 234           | 15.0               | 32.6          | 79.6               | 4.02          | 152                               | 1.01  |                                      |
| $x=0.7$ | OLA    | 8.2                | 262           | 26.2               | 62.9          | 65.6               | 4.44          | 163                               | 1.08  | 0.858                                |
|         | MPA    | 4.5                | 249           | 16.9               | 42.7          | 78.6               | 4.09          | 143                               | 1.02  |                                      |
| $x=0.9$ | OLA    | 8.8                | 158           | 34.4               | 38.0          | 56.8               | 4.60          | 91.0                              | 1.14  | 9.97                                 |
|         | MPA    | 0.8                | 186           | 16.4               | 23.2          | 82.8               | 3.33          | 47.7                              | 1.03  |                                      |

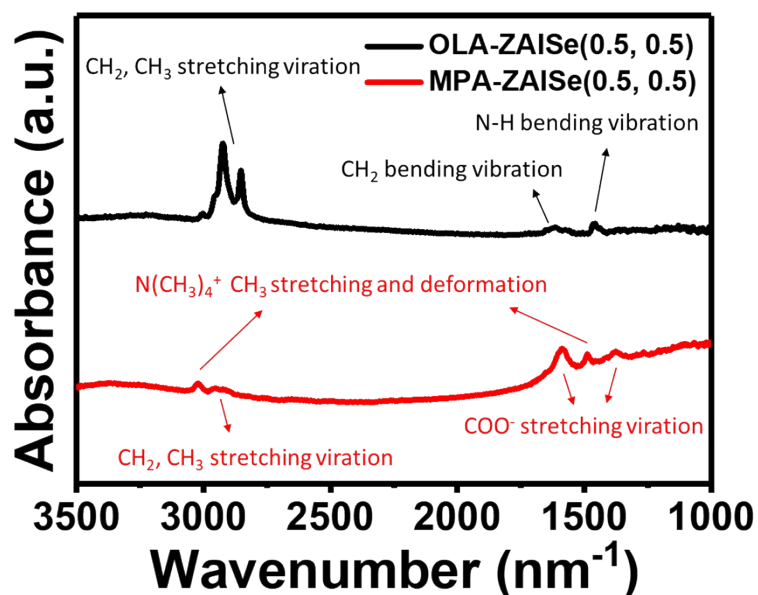

**Fig. S1** FTIR spectra of ZAISe(0.5, 0.5) QDs modified with OLA (black line) and MPA (red line).

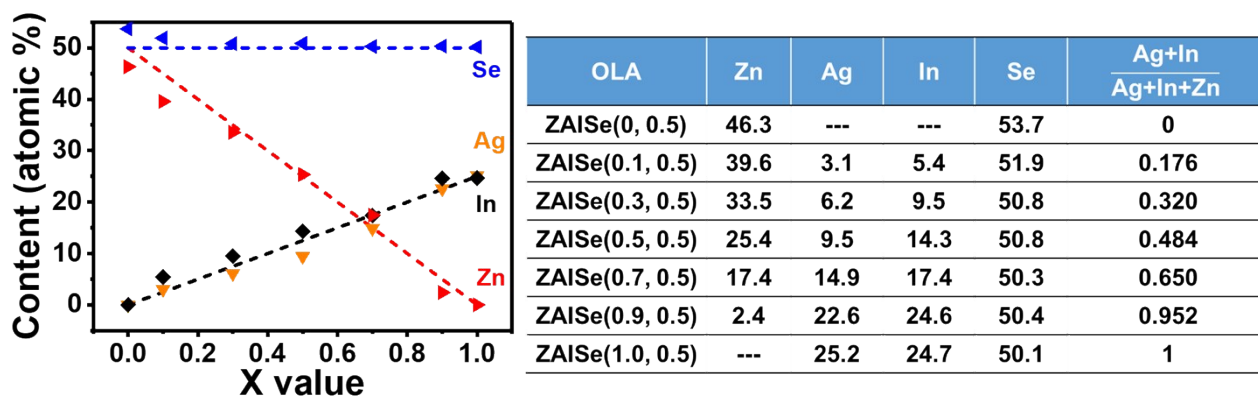

Fig. S2 Chemical compositions of OLA-ZAISe( $x$ , 0.5) QDs with various  $x$  values. Dashed lines represent theoretical values estimated from the ratios of precursor concentrations.

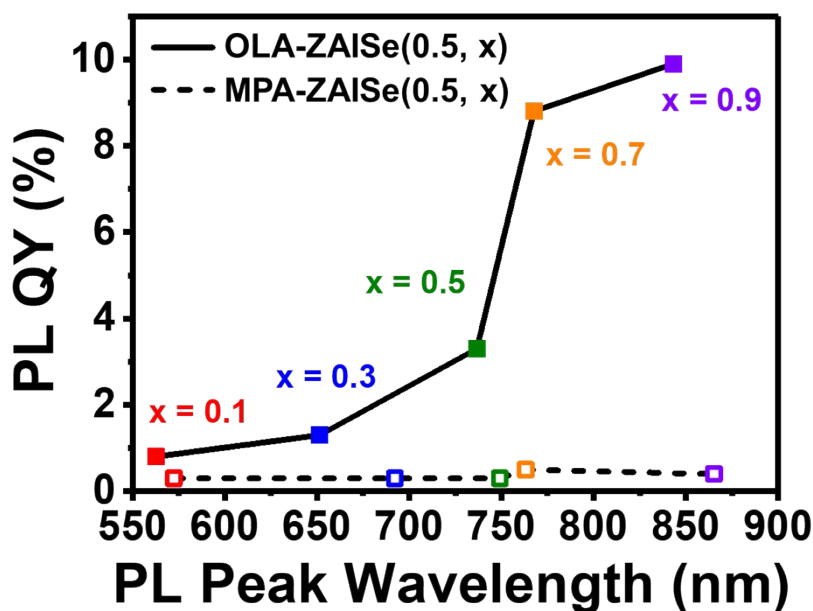

Fig. S3 Relationship between PL QY and the peak wavelength of PL spectra for OLA-ZAISe( $x$ , 0.5) and MPA-ZAISe( $x$ , 0.5) with various  $x$  values.

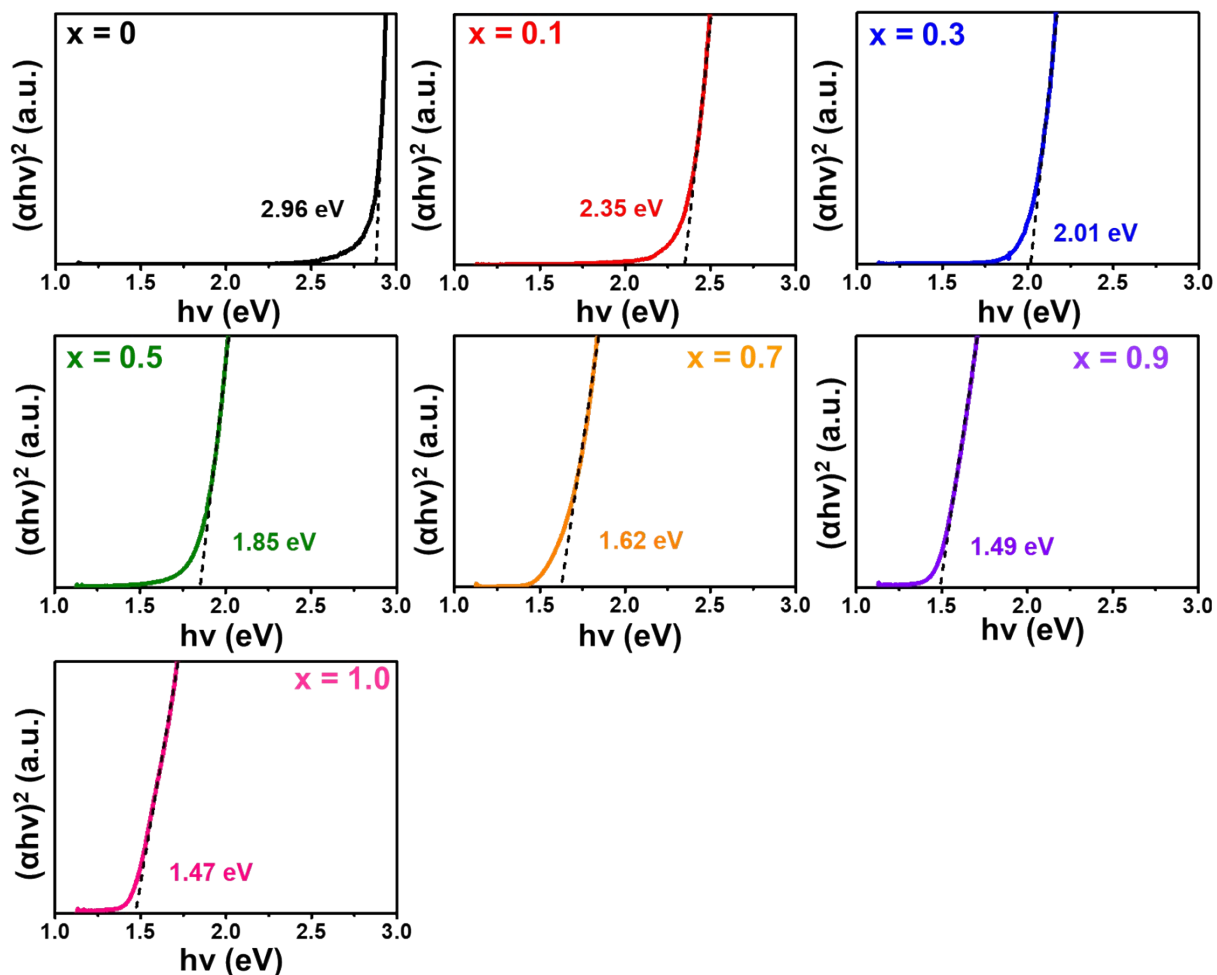

Fig. S4 Tauc plots for calculating the bandgap of OLA-ZAISe( $x$ , 0.5) with different  $x$  values.

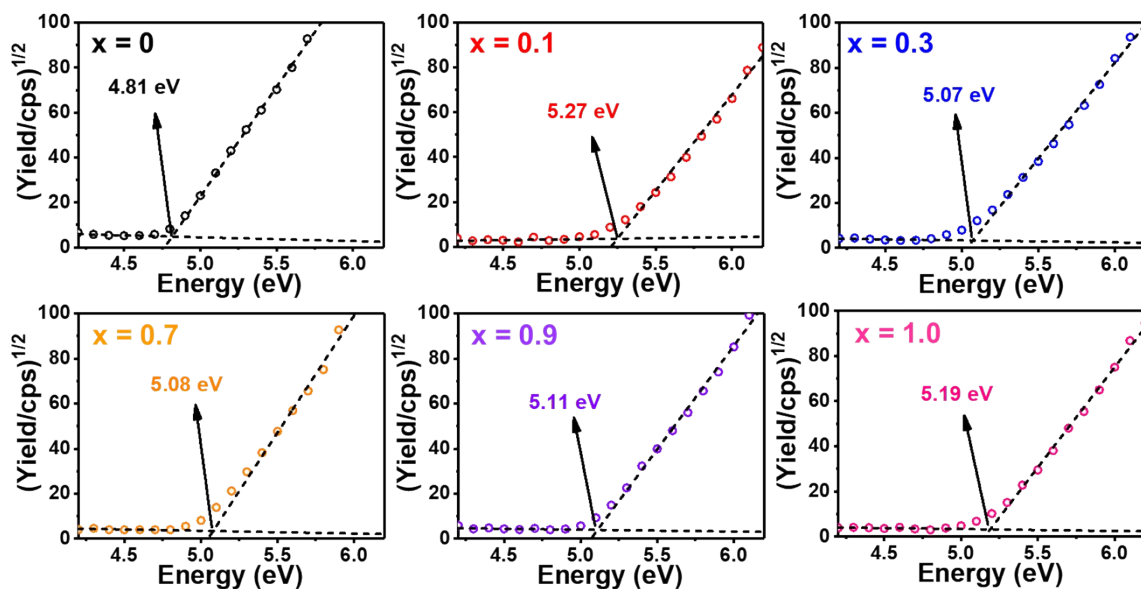

Fig. S5 PYSA spectra of OLA-ZAISe( $x$ , 0.5) with varied  $x$  values. The number in each panel is the onset photon energy, that is, the ionization energy determined.

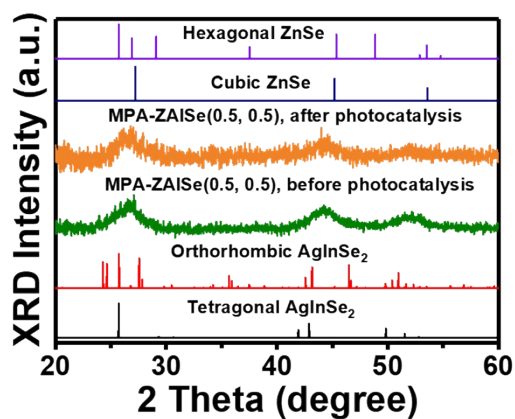

| MPA-ZAISe(0.5, 0.5)   | Zn    | Ag    | In    | Se    | x    |
|-----------------------|-------|-------|-------|-------|------|
| before photocatalysis | 24.03 | 10.13 | 16.02 | 49.82 | 0.52 |
| after photocatalysis  | 24.85 | 10.88 | 15.85 | 48.42 | 0.52 |

Fig. S6 XRD patterns and EDX data for MPA-ZAISe(0.5, 0.5) before and after the photocatalytic reaction.

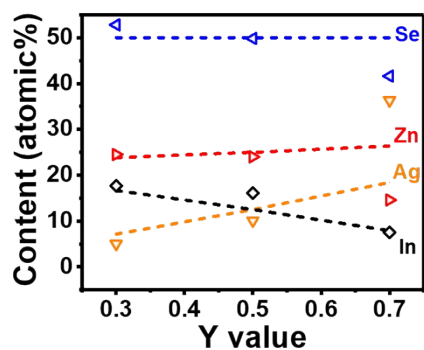

| MPA             | Zn   | Ag   | In   | Se   | Ag+In<br>Ag+In+Zn | Ag<br>Ag+In |
|-----------------|------|------|------|------|-------------------|-------------|
| ZAISe(0.5, 0.3) | 24.5 | 5.0  | 17.7 | 52.8 | 0.481             | 0.220       |
| ZAISe(0.5, 0.5) | 24.0 | 10.1 | 16.1 | 49.8 | 0.521             | 0.385       |
| ZAISe(0.5, 0.7) | 14.6 | 36.3 | 7.5  | 41.6 | 0.750             | 0.829       |

Fig. S7 Chemical compositions of MPA-ZAISe(0.5, y) with various y values. Dashed lines represent theoretical values estimated from the ratios of precursor concentrations.

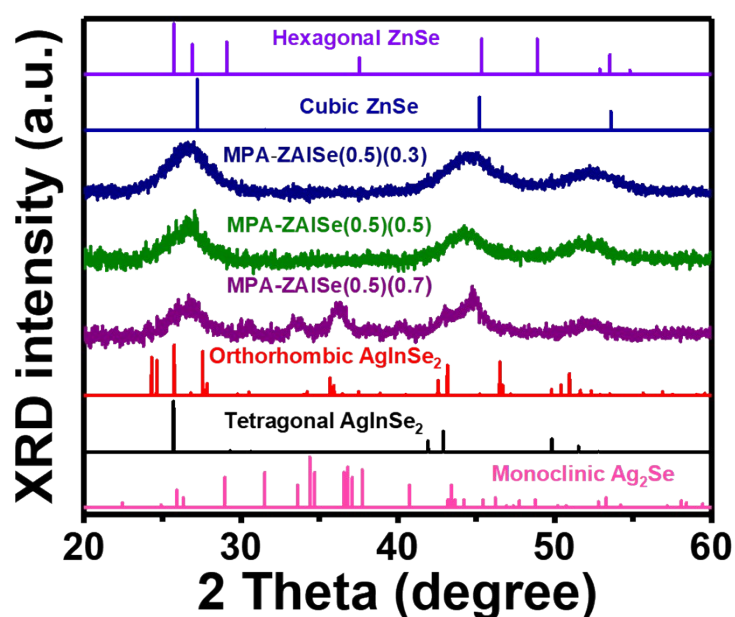

Fig. S8 XRD patterns of MPA-ZAISe(0.5,  $y$ ) with varied  $y$  values.

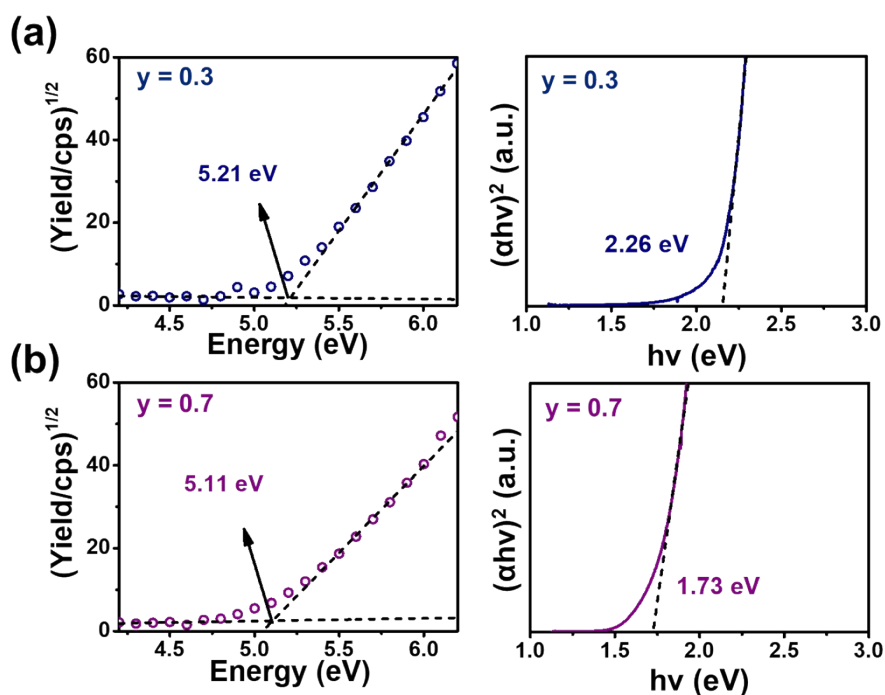

Fig. S9 PYSA spectra and Tauc plots of ZAISe(0.5,  $y$ ) with  $y=0.3$ (a) and  $0.7$ (b).

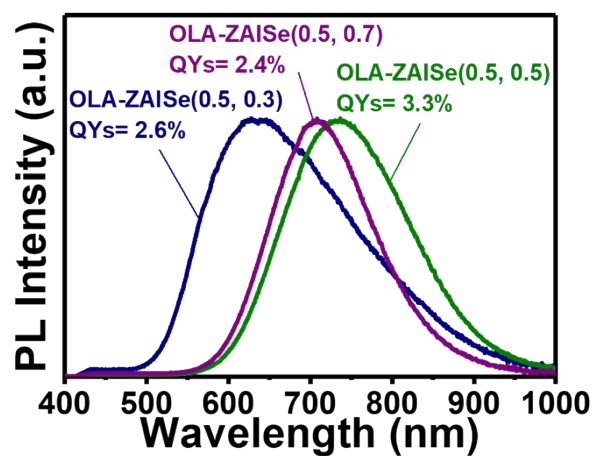

Fig. S10 PL spectra of OLA-ZAISe(0.5,  $y$ ) with varied  $y$  values. Corresponding PL QYs are shown in the panel.
